# Supplementary material
Source: HighWire-hosted journal article supplement (https://jnm.snmjournals.org/highwire/filestream/95066/field_highwire_adjunct_files/0/178996_Supplemental_Data.pdf)
Supplement: 178996_Supplemental_Data.pdf [file 178996_Supplemental_Data.pdf]

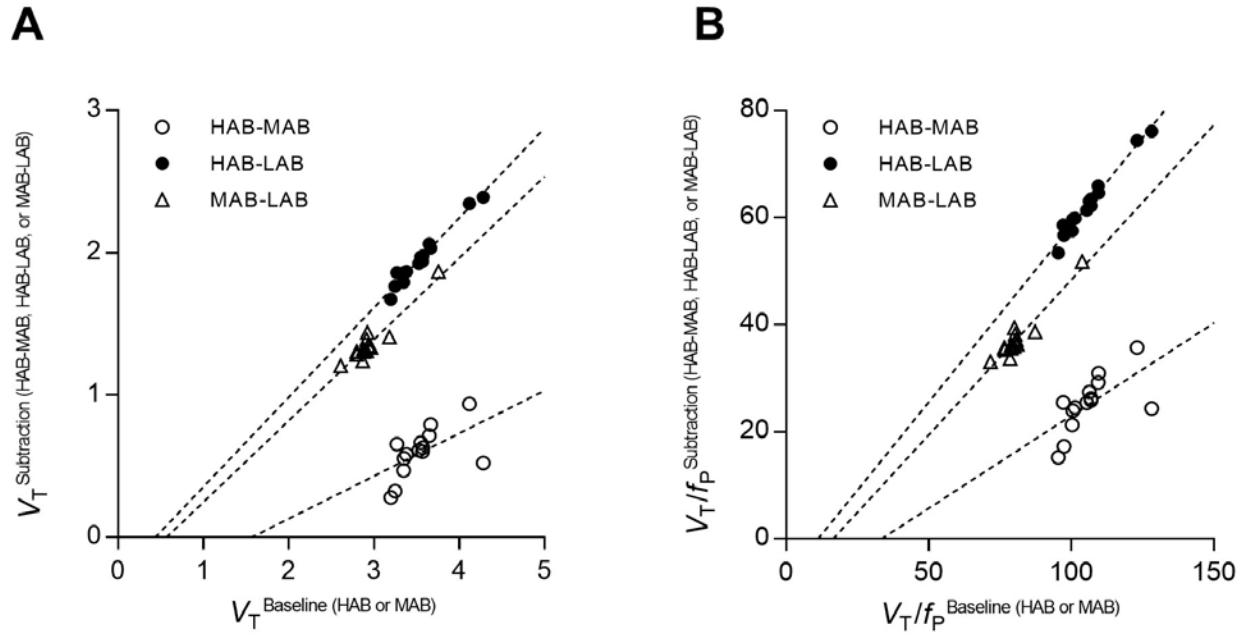

**Supplemental Figure 1.** Polymorphism plot of three each for high- (HABs) and mixed- (MABs) affinity binders and two low-affinity binders (LABs) to determine a population average of nondisplaceable distribution volume ( $V_{ND}$ ) (A) or  $V_{ND}$  corrected for plasma free fraction ( $V_{ND}/f_P$ ) (B) of  $^{11}\text{C}$ -ER176 in brain. The combination of HABs and MABs (HAB-MAB) showed a poor linear fitting.

**Supplemental Table 1.** Administered doses for 20 scans in 17 healthy subjects injected with  $^{11}\text{C}$ -ER176.

Whole-body scans

|                              | All<br>(n = 9 batches)   | HABs (n = 3) | MABs (n = 3) | LABs (n = 3) |
|------------------------------|--------------------------|--------------|--------------|--------------|
| Injected mass dose (pmol/kg) | 107 ± 54<br>(34 – 193)   | 66 ± 48      | 116 ± 56     | 140 ± 46     |
| Injected activity (MBq)      | 646 ± 127<br>(371 – 735) | 536 ± 184    | 691 ± 55     | 712 ± 24     |

Brain scans

|                              | All<br>(n = 11 batches) | HABs (n = 3) |          | MABs (n = 3) | LABs (n = 2) |
|------------------------------|-------------------------|--------------|----------|--------------|--------------|
|                              |                         | Baseline     | Blocked* | Baseline     | Baseline     |
| Injected mass dose (pmol/kg) | 91 ± 52<br>(33 – 198)   | 89 ± 94      | 102 ± 49 | 66 ± 12      | 113 ± 27     |
| Injected activity (MBq)      | 700 ± 25<br>(656 – 725) | 672 ± 23     | 696 ± 21 | 720 ± 4      | 718 ± 9      |

HABs = high-affinity binders, MABs = mixed-affinity binders, LABs = low-affinity binders. Data are mean ± SD (above) and range (below). \*Preblocking dose with XBD173 was 90 mg.

**Supplemental Table 2.** Residence times of source organs determined from whole-body imaging of nine healthy subjects injected with  $^{11}\text{C}$ -ER176.

| Organ             | Residence time (hours) |
|-------------------|------------------------|
| Brain             | 0.0116 ± 0.0031        |
| Thyroid           | 0.0004 ± 0.0002        |
| Lung              | 0.0363 ± 0.0100        |
| Heart             | 0.0049 ± 0.0016        |
| Liver             | 0.0270 ± 0.0086        |
| Spleen            | 0.0081 ± 0.0033        |
| Kidney            | 0.0145 ± 0.0036        |
| Remainder of Body | 0.3869 ± 0.0206        |

Values are mean ± SD.

**Supplemental Table 3.** Radiation dosimetry estimates for  $^{11}\text{C}$ -ER176 determined from nine healthy subjects.

| Organ                      | Radiation dose<br>( $\mu\text{Sv}/\text{MBq}$ ) |
|----------------------------|-------------------------------------------------|
| Adrenals                   | 3.4 $\pm$ 0.1                                   |
| Brain                      | 3.1 $\pm$ 0.7                                   |
| Breasts                    | 2.2 $\pm$ 0.4                                   |
| Gallbladder Wall           | 4.4 $\pm$ 1.9                                   |
| Lower Large Intestine Wall | 2.8 $\pm$ 0.1                                   |
| Small Intestine            | 2.9 $\pm$ 0.1                                   |
| Stomach Wall               | 3.0 $\pm$ 0.0                                   |
| Upper Large Intestine Wall | 2.9 $\pm$ 0.1                                   |
| Heart Wall                 | 5.7 $\pm$ 1.3                                   |
| Kidneys                    | 14.3 $\pm$ 3.2                                  |
| Liver                      | 5.7 $\pm$ 1.4                                   |
| Lungs                      | 10.4 $\pm$ 2.5                                  |
| Muscle                     | 2.5 $\pm$ 0.1                                   |
| Ovaries                    | 2.9 $\pm$ 0.1                                   |
| Pancreas                   | 3.5 $\pm$ 0.1                                   |
| Red Marrow                 | 2.4 $\pm$ 0.0                                   |
| Osteogenic Cells           | 3.6 $\pm$ 0.1                                   |
| Skin                       | 2.0 $\pm$ 0.1                                   |
| Spleen                     | 13.5 $\pm$ 4.8                                  |
| Testes                     | 2.3 $\pm$ 0.1                                   |
| Thymus                     | 2.8 $\pm$ 0.1                                   |
| Thyroid                    | 6.0 $\pm$ 2.5                                   |
| Urinary Bladder Wall*      | 2.7 $\pm$ 0.1                                   |
| Uterus                     | 2.9 $\pm$ 0.1                                   |
| Total Body                 | 2.9 $\pm$ 0.0                                   |
| Effective Dose             | 4.1 $\pm$ 0.4                                   |

\* Dynamic urinary bladder model was not used.

Values are expressed as mean  $\pm$  SD.
